# Supplementary material
Source: PubMed Central journal article supplement (PMC3003372)
Supplement: supp_M110.159608_jbc.M110.159608-1.pdf [file supp_M110.159608_jbc.M110.159608-1.pdf]

SUPPLEMENTARY DATA

Figure S1

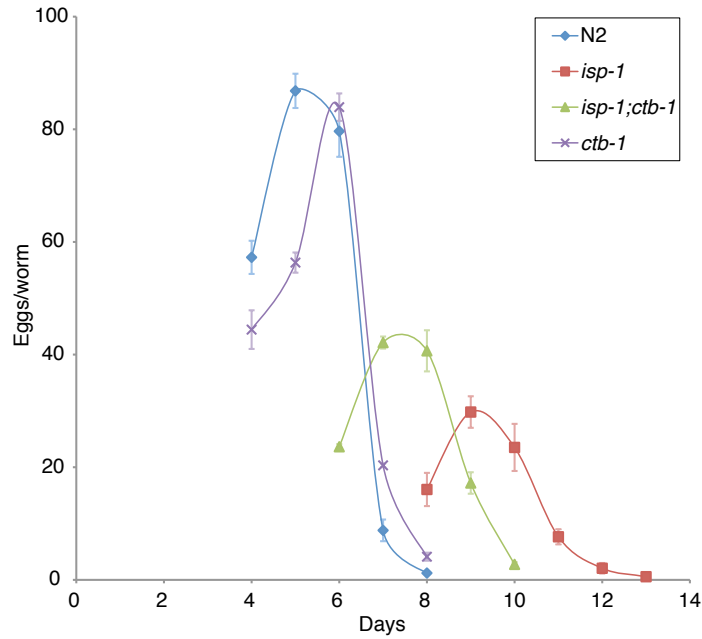

**Fig. S1.** Number of eggs per worm per day in complex III mutants and wild type. Plates were examined every 24 hours. Day 0 is the day that parental animals were hatched. Data are represented as mean +/- SEM from three independent worm cultures (totaling 30 adult animals for each strain).

Figure S2

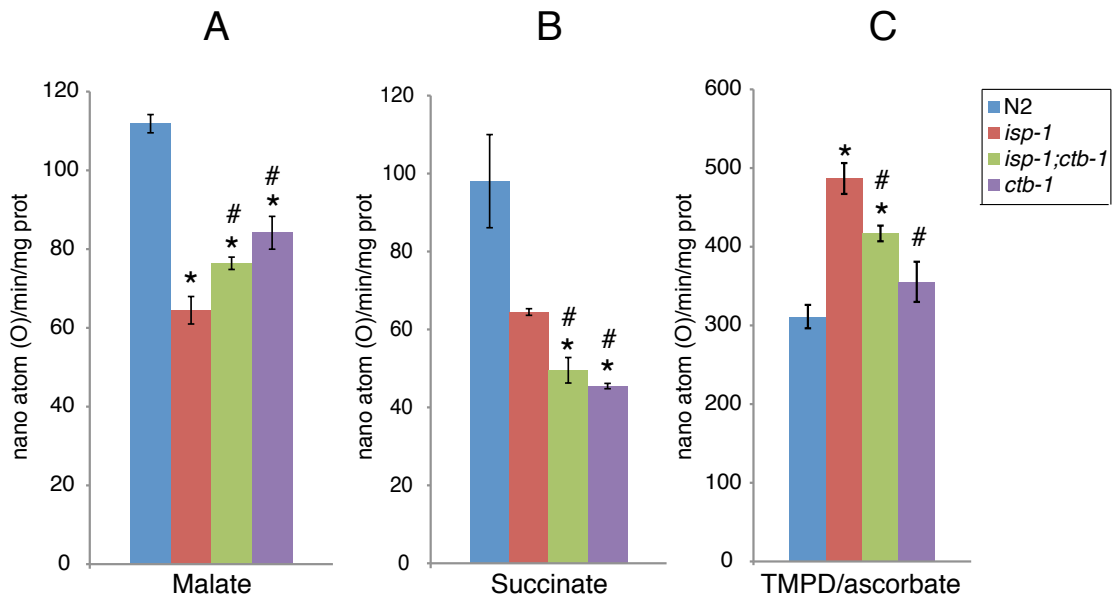

**Fig. S2. Integrated Mitochondrial Function.** Intact mitochondria were isolated from complex III mutants and wild type, then assayed for oxygen consumption rates. Malate, succinate and TMPD/ascorbate were the substrates to stimulate complex I-, complex II- and complex IV-dependent respiration, respectively. Data are represented as mean +/- SEM from four independent experiments. \* and # indicate statistical significances as  $p < 0.05$  in comparison to wild type and *isp-1*, respectively.

**Figure S3**

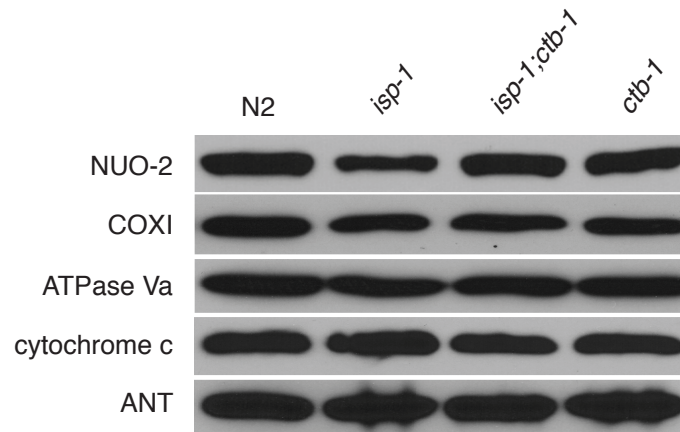

**Fig. S3. The steady-state level of respiratory chain subunits.** SDS-PAGE/Western blot analysis of NUO-2 subunit of complex I, COX I subunit of complex IV, ATPase subunit Va and cytochrome c; ANT was a loading control. (Quantification of the bands is shown in Table S3).

**Table S1**

| Strain             | L3   | L4   | Adult | Total eggs/worm |
|--------------------|------|------|-------|-----------------|
| N2                 | D2.5 | D3   | D3.5  | 223.8±3.9       |
| <i>isp-1</i>       | D5.5 | D6.5 | D7.5  | 79.6±10.7       |
| <i>isp-1;ctb-1</i> | D3.5 | D4.5 | D5    | 126.4±9.3       |
| <i>ctb-1</i>       | D2.5 | D3   | D3.5  | 209±9.2         |

**Table S1. Development of complex III mutants and N2 at 20° C.** Synchronized cultures of worms were studied for the rate of development to adulthood and subsequent fecundity. Three independent cultures totaling 30 animals for each strain were studied. Error is ± S.D.

**Table S2**

| <i>C. elegans</i> | Human   | <i>isp-1</i> 's unique bands |       |
|-------------------|---------|------------------------------|-------|
|                   |         | ISP-A                        | ISP-B |
| Y56A3A.19         | NDUFB1  |                              | +     |
| C18E9.4           | NDUFB3  |                              | +     |
| W01A8.4           | NDUFB4  | +                            | +     |
| ZK809.3           | NDUFB6  | +                            | +     |
| D2030.4           | NDUFB7  | +                            | +     |
| Y51H1A.3a         | NDUFB8  | +                            | +     |
| C16A3.5           | NDUFB9  | +                            | +     |
| F59C6.5           | NDUFB10 | +                            | +     |
| Y71H2AM.4         | NDUFC2  | +                            | +     |
| Y54F10AM.5        | NDUFA8  | +                            |       |
| Y54E10BL.5        | NDUFS5  | +                            |       |
| MTCE.25           | ND4     | +                            |       |
| MTCE.35           | ND5     | +                            |       |
| F42G8.12          | UQCRFS1 | +                            | +     |
| MTCE.21           | MT-CYB  | +                            |       |
| C54G4.8           | CYC1    | +                            | +     |
| F56D2.1           | UQCRC1  | +                            | +     |
| T10B10.2          | UQCRC2  | +                            | +     |
| VW06B3R.1a        | UQCRC2  | +                            |       |
| T02H6.11          | UQCRB   | +                            | +     |
| F45H10.2          | UQCRQ   | +                            | +     |
| MTCE.31           | MT-CO2  | +                            | +     |
| W09C5.8           | COX4I1  | +                            | +     |
| F26E4.6           | COX7C   | +                            | +     |
| cco-2             | COX5A   |                              | +     |
| Y71H2AM.5         | COX6B   | +                            | +     |

**Table S2. Proteomic analysis of ISP-A and ISP-B.** Only MRC encoding genes are listed. *C. elegans* and human gene names encoding the identified proteins are obtained from the *C. elegans* Genetics Center and HUGO Gene Nomenclature Committee respectively. Absence of a subunit does not preclude its presence in the protein band as mass spectrometry may miss individual proteins. Turquoise shading indicates complex I subunits, yellow complex III, and peach complex IV.

**Table S3**

|              | N2   | <i>isp-1</i>          | <i>isp-1;ctb-1</i>      | <i>ctb-1</i>            |
|--------------|------|-----------------------|-------------------------|-------------------------|
| NUO-2        | 100% | 68.77±5.44%<br>(0.01) | 100.78±1.94%<br>(0.56)  | 92.21±3.91%<br>(0.08)   |
| Cytochrome c | 100% | 107.59±7%<br>(0.2)    | 116.38±23.84%<br>(0.35) | 103.13±9.58%<br>(0.63)  |
| COX I        | 100% | 83.32±27.1%<br>(0.4)  | 96.44±28.12%<br>(0.85)  | 109.94±34.49%<br>(0.73) |

**Table S3.** Relative expression of NUO-2, cytochrome c and COX I in complex III mutants when ANT is used as a loading control. N2 = 100% expression (n= 3, *p*-values in the parentheses).
